# Supplementary material
Source: publisher figshare collection journal article supplement (https://adisjournals.figshare.com/articles/dataset/_/13677457)
Supplement: Supplementary file 1 [file 1]

# Effectiveness and Safety of COPD Maintenance Therapy with Tiotropium/Olodaterol versus LABA/ICS

Jennifer K. Quint, Jukka Montonen, Daina B. Esposito, Xintong He, Leslie Koerner, Laura Wallace, Alberto de la Hoz, Marc Miravittles

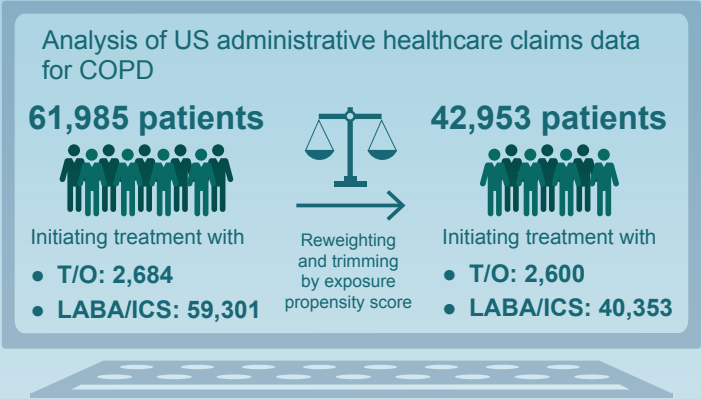

We assessed the risk of:

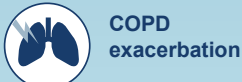

COPD exacerbation

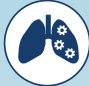

Pneumonia

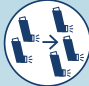

Escalation to triple therapy

and the combined risk of any one of the above

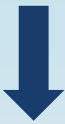

Tiotropium/olodaterol was associated with a lower risk of COPD exacerbations, pneumonia and escalation to triple therapy versus LABA/ICS; the combined risk was lower versus LABA/ICS, irrespective of baseline eosinophil count or exacerbation history

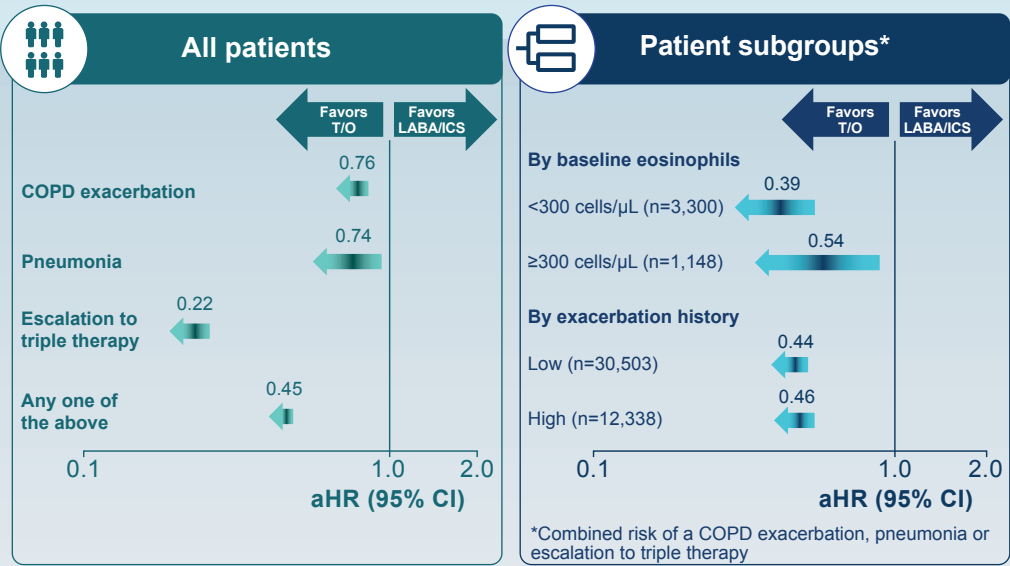

**Conclusion:** These results highlight the important role of LAMA/LABA in the management of COPD, and implicate it as a strong alternative to LABA/ICS to avoid ICS overuse and reduce exacerbations in patients with COPD

aHR, adjusted hazard ratio; CI, confidence interval; COPD, chronic obstructive pulmonary disease; ICS, inhaled corticosteroids; LABA, long-acting  $\beta_2$ -agonist; LAMA, long-acting muscarinic antagonist; T/O, tiotropium/olodaterol.

The graphical abstract represents the opinions of the authors. For a full list of declarations, including funding and author disclosure statements, please see the full text online. ©The authors, CC-BY-NC 2021.
